# Supplementary material
Source: Springer Nature journal article supplement (https://www.springermedizin.de/resource/supplementary/12905_2012_323_MOESM1_ESM.pdf/9518498)
Supplement: MOESM1 [file 9518498]

Breast tissue specimens available at Vermont and New Hampshire Breast Cancer Surveillance Consortium (BCSC) registries for women aged  $\geq 40$  years who received a breast biopsy between January 1, 2000 - December 31, 2008.  
N=19,498 from 13,677 distinct women.

Cases randomly selected for preliminary review and available from clinical facility  
N=425

**Case not included in study after preliminary review, N=55**

- Cases randomly removed because diagnostic, age or density category full, n=25
- Not enough tissue present to interpret slide, n=24
- Tissue other than breast present, n=5
- Tissue block not available from clinical facility, n=1

Cases reviewed by expert pathology panel using new study-specific slides  
N= 370

**Cases removed, N=34**

- Case removed due to artifact on slide, n=16
- Cases randomly removed because diagnostic, age and density category full, n=15
- Male breast tissue present, n=1
- Atypical lactation changes present, n=1
- Ineligible due to age <40 years at time of biopsy, n=1

Cases available for possible inclusion in final test set  
N= 336

**Cases randomly selected for final test set  
N=240**

Test Set A  
N=60

Test Set B  
N=60

Test Set C  
N=60

Test Set D  
N=60
